# Supplementary material for: Transcriptome assists prognosis of disease severity in respiratory syncytial virus infected infants
Source: PubMed Central journal article supplement (PMC5105123; doi:10.1038/srep36603), 2016-11-11
Supplement: srep36603-s1.pdf [file srep36603-s1.pdf]

# **Transcriptome assists prognosis of disease severity in respiratory syncytial virus infected infants**

Victor L. Jong, Inge M.L. Ahout, Henk-Jan van den Ham, Jop Jans, Fatiha Zaaraoui-Boutahar, Aldert Zomer, Elles Simonetti, Maarten A. Bijl, H. Kim Brand, Wilfred F.J. van IJcken, Marien I. de Jonge, Pieter L. Fraaij, Ronald de Groot, Albert D.M.E. Osterhaus, Marinus J. Eijkemans, Gerben Ferwerda, and Arno C. Andeweg

**Online Data Supplement**

## Material and Methods

### Study design

Nasopharyngeal wash (using Cheiron Dynamic II apparatus) and blood samples were prospectively obtained from patients less than 2 years of age with a bronchiolitis. Patient enrolment occurred 7 days a week and samples were taken within 24 hours after first contact with the hospital. Only patients with an RSV infection, as determined by PCR retrospectively, were included in the study. Exclusion criteria were: immunodeficiency, systemic steroid treatment in the previous 2 weeks, blood transfusion, congenital heart and chronic lung disease. Patients were followed until recovery and were retrospectively classified as: mild for children without hypoxia, moderate for patients requiring supplemental oxygen (oxygen saturations <90%, ≥10 minutes) and severe for children requiring mechanical ventilation due to apnea, exhaustion and/or respiratory failure. Recovery samples were obtained after 4-6 weeks, during home visits. Blood samples were obtained from healthy patients without underlying diseases or medication subjected to elective surgery.

### Sample processing and blood transcriptome profiling

Multiplex RT-PCR was performed to test the nasopharyngeal washes on 15 different viral pathogens, as previously described (E1). Blood was collected in Tempus tubes and stored at -80°C. Total RNA was isolated from the blood using Tempus Spin RNA isolation kit (Applied Biosystems, Bleiswijk, The Netherlands). Globin mRNA was removed from total RNA preparations using the GlobinClear kit (Life Technologies). RNA concentrations and OD 260/280 ratios were measured with the NanoDrop ND-1000 UV-VIS spectrophotometer (NanoDrop Technologies, Wilmington, USA). Assessment of RNA quality and purity was performed with the RNA 6000 Nano assay on the Agilent 2100 Bioanalyzer (Agilent Technologies, Palo Alto, CA, USA). RNA (200ng) was labelled using the MessageAmp Premier RNA Amplification kit (Applied Biosystems) and hybridized to Human Genome U133 plus 2 gene chips (Affymetrix), according to the manufacturer's recommendations. Image analysis was performed using GeneChip Operating Software (Affymetrix). Microarray Suite version 5.0 software (Affymetrix) was used to generate .dat and .cel files.

### Differential expression analysis

For  $j = 1 \dots n$  samples and  $i = 1, \dots, p$  transcripts (probesets) the linear model for each probeset was as follows:

$$Y_{ij} = \beta_i \mathbf{Status}_j + \alpha_{i1} \mathbf{Sex}_j + \alpha_{i2} \mathbf{Age}_j + \alpha_{i3} \mathbf{Sex}_j * \mathbf{Age}_j + \epsilon_{ij} \quad (1)$$

Where  $Y_i$  is a vector of the expression values of probeset  $i$ ,  $\mathbf{Status}$  is an indication matrix of the samples by RSV categories and  $\beta_i$  is a vector of coefficients of the RSV categories for

probeset  $i$ . The DE analysis was then performed by comparing the contrasts of *Status* for each probeset.

### Identification and evaluation of prognostic biomarkers

Given that we are interested in genomic prognostic biomarker(s), we retained a sex by age standardized dataset by fitting the linear models in equation (1) above using *limma* (E2) and from those models the sex by age standardized expression set was:

$$\hat{Y}_{ij} = \beta_i \text{Status}_j + \varepsilon_{ij} \quad (2)$$

As class labels, we combined the mild and moderate groups as one class (class 0) with focus on predicting severe cases (class 1) from others. For clinical application, a prediction of the probability to progress to severe disease is of primary interest than direct classification (E3). Therefore, using results of (E4, E5) and the observed correlation distribution shown on supplementary Fig. S2 three classification functions were chosen. These classification functions were support vector machines (SVM) with a linear kernel (E6), shrunken centroids discriminant analysis (SCDA) also known as prediction analysis of microarray (PAM) (E7) and random forest (RF) (E8).

For each classification function, a prediction model was built and evaluated using leave one out cross validation with an inner loop of 5-fold cross validation for parameter(s) optimization as shown on Fig. S6 step 1, optimizing the parameters by maximizing the binomial log-likelihood function. We evaluated the prediction models using calibration score (CS) and refinement score (RS) (E5) which is a decomposition of the Brier score. The calibration score expresses on one hand, how well the predicted probabilities agree with the true chances of patients and it is equal to zero in case of perfect agreement. On the other hand, the refinement score expresses how uncertain the predicted probabilities are; that is how close the predicted probabilities are to 0.5. The closer the predicted probabilities are to 0.5, the higher the uncertainty and the poorer the model. A good class prediction model has a CS and RS of zero. The best calibrated and refined function amongst the three classification functions (Fig. S3) was chosen and its performance evaluated using the area under the receiver operating characteristic (ROC) curve (AUC) as shown on Fig. S6 step 2. Whereas a ROC curve is a plot of the true positive rate against the false positive rate for the different possible cut-points of the prediction model, AUC measures the accuracy of the model. An AUC of 1 represents a perfect model and an AUC of 0.5 represents a worthless model.

For the chosen classification function, the model was built on the entire dataset with a 5-fold cross validation for parameter(s) optimization based on maximizing the binomial log-likelihood function. The list of transcripts from the optimal parameter(s) was retained (Fig. S6, step 3) as a gene signature.

## Logistic regression models

Let  $p_i$  be the leave one out cross-validated predicted probability of sample  $i$  to progress to severe state by a genomic signature, then the genomic score is given as:  $GS_i = \log\left(\frac{p_i}{1-p_i}\right)$ . The general logistic regression model is then written as:

$$\log\left(\frac{\pi(x_i)}{1-\pi(x_i)}\right) = \beta_0 + \boldsymbol{\beta}_1 \mathbf{P}_i \quad (3)$$

where  $\pi(x_i)$  is the probability of sample  $i$  to progress to severe state,  $\mathbf{P}$  a vector or matrix of predictive parameters (i.e. Genomic score, Age, and/or Sex) and  $\boldsymbol{\beta}_1$  is a vector of parameter(s) estimate(s). Let  $y_i$  be the predicted value of sample  $i$  from equation (3), the probability of that sample to progress to severe state is computed from its predicted value using the inverse logistic function as:  $\pi(x_i) = \frac{e^{y_i}}{1+e^{y_i}}$ . With these predicted probabilities, the AUCs were computed.

## Validation of biomarkers

For an independent (external) validation, a subset of the Illumina RSV data set of (E9) was used. Since the experimental data and validation data are from different platforms, we opted to link the data using gene symbols. To achieve this, the signature transcripts were annotated to gene symbols and unannotated transcripts were eliminated if any (Fig. S6, step 4). The Illumina data was also annotated to gene symbols (Fig. S6, step 5) and the common genes between our annotated gene signature and the annotated Illumina data were extracted using common gene symbols as shown in step 6 of Fig. S6 and were referred to as the surrogate signature (step 7). The final expression set of the surrogate signature was computed by assigning the median expression value of a gene with multiple transcripts to the corresponding gene (step 8) and was referred to as unique surrogate signature. The final model was then built with the unique surrogate signature expression set from the Affymetrix data (step 9) and validated with the unique surrogate signature expression data from Illumina (step 12).

To be able to validate with the Illumina data, all the beads corresponding to the genes in the surrogate signature were retrieved (step 10) and multiple beads per gene were combined by calculating their median expression values (step 11). Since the expression values of a single gene might be measured on different scales across Illumina and Affymetrix platforms, we rescaled the Illumina data of the gene signature to same scale as Affymetrix data (step 12). Suppose for each gene  $i$  the expression scale in Affymetrix is in the interval  $[a_i, b_i]$  and  $[c_i, d_i]$  in Illumina. To transform an expression value  $x_{ij}$  of gene  $i$  in sample  $j$  from Illumina to Affymetrix scale, we use the following function:

$$f(x_{ij}) = a_i + \frac{(b_i - a_i) \times (x_{ij} - c_i)}{(d_i - c_i)} \quad d_i \neq c_i \quad (4)$$

The scaled Illumina data was then predicted using our prognostic model (step 12) and the validating ability of the model was evaluated (steps 13 and 14) of the same Fig. S6. Worth to mention is the fact

that this transformation does not affect the expression values of genes with same scale on Affymetrix and Illumina platforms and since there is no gene with a constant expression value, the function stays defined.

For a confirmatory analysis of our validation performance, using the chosen classification function we built class prediction model on the entire Illumina data using LOOCV as shown on step 1 of Fig. S6. We then compared our validation performance to the performance that can be achieved on this data with the chosen function.

## Figures and Tables

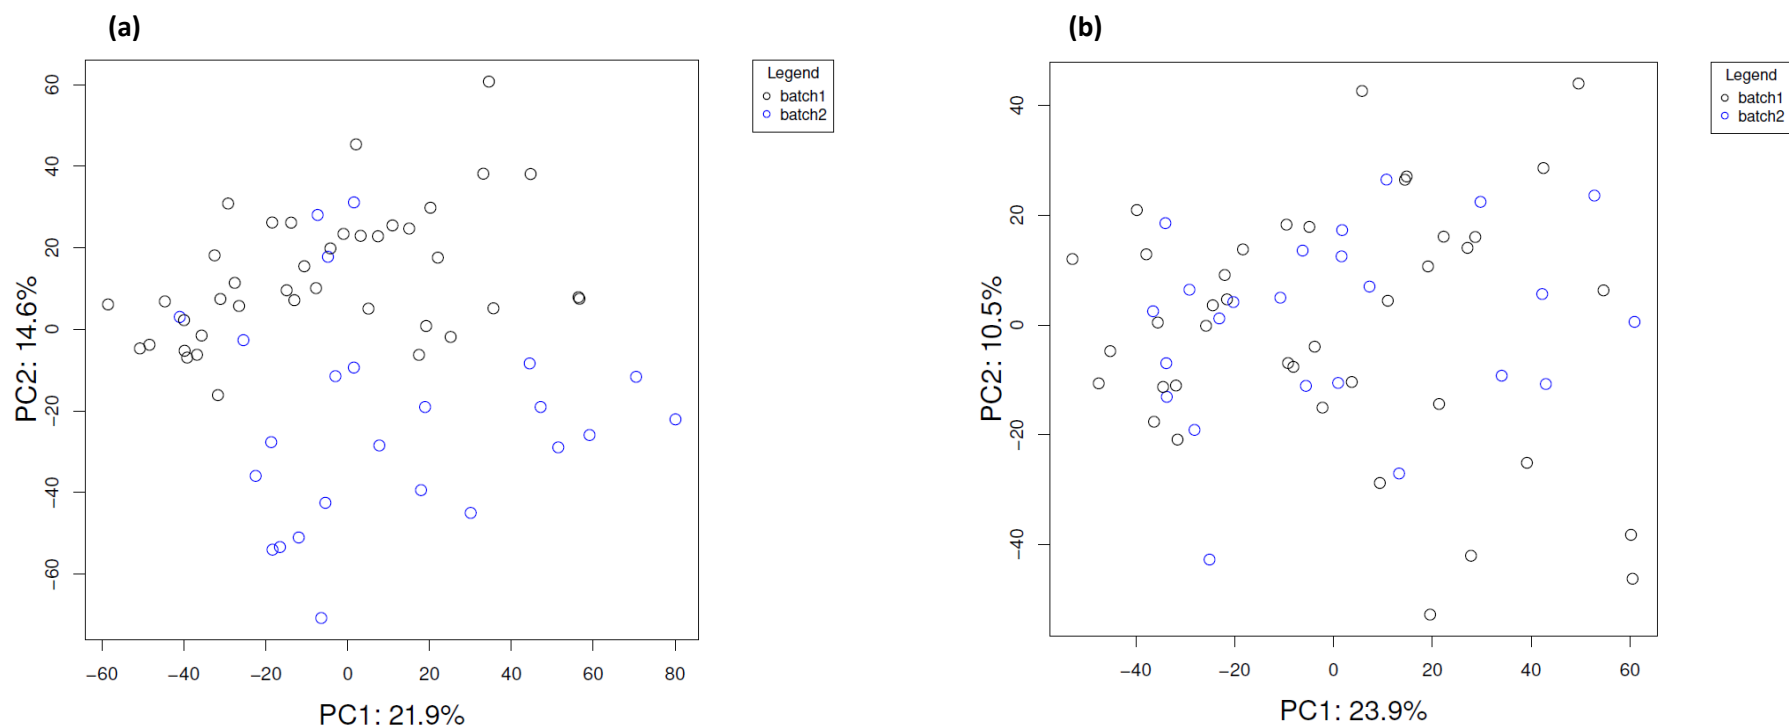

**Figure S1:** *Principal component analysis (PCA) of all probesets before (a) and after (b) batch adjustment. It can clearly be seen that before batch adjustment samples from both batches cluster together on PC2 while such clusters disappear after batch adjustment.*

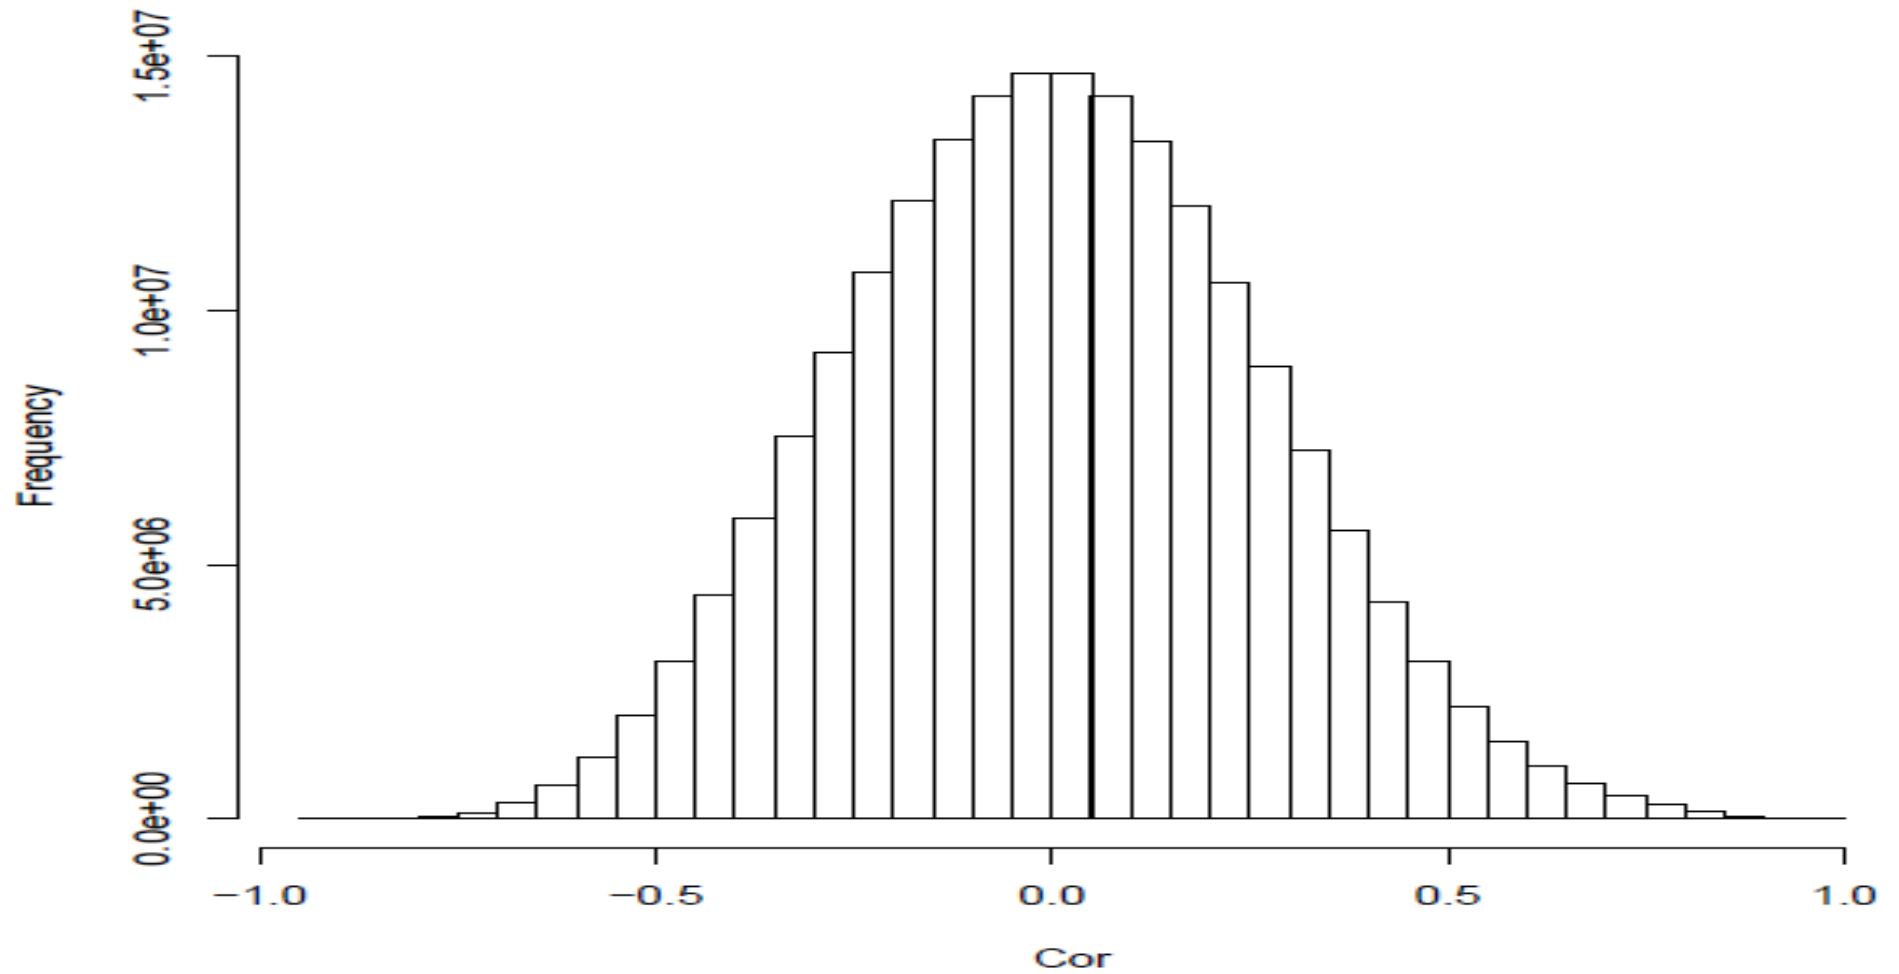

**Figure S2:** *Distribution of transcripts' pair-wise correlation values (cor) for the RSV experimental data. This figure clearly shows a low proportion of highly correlated genes. As such, the data might be classified as lowly correlated data.*

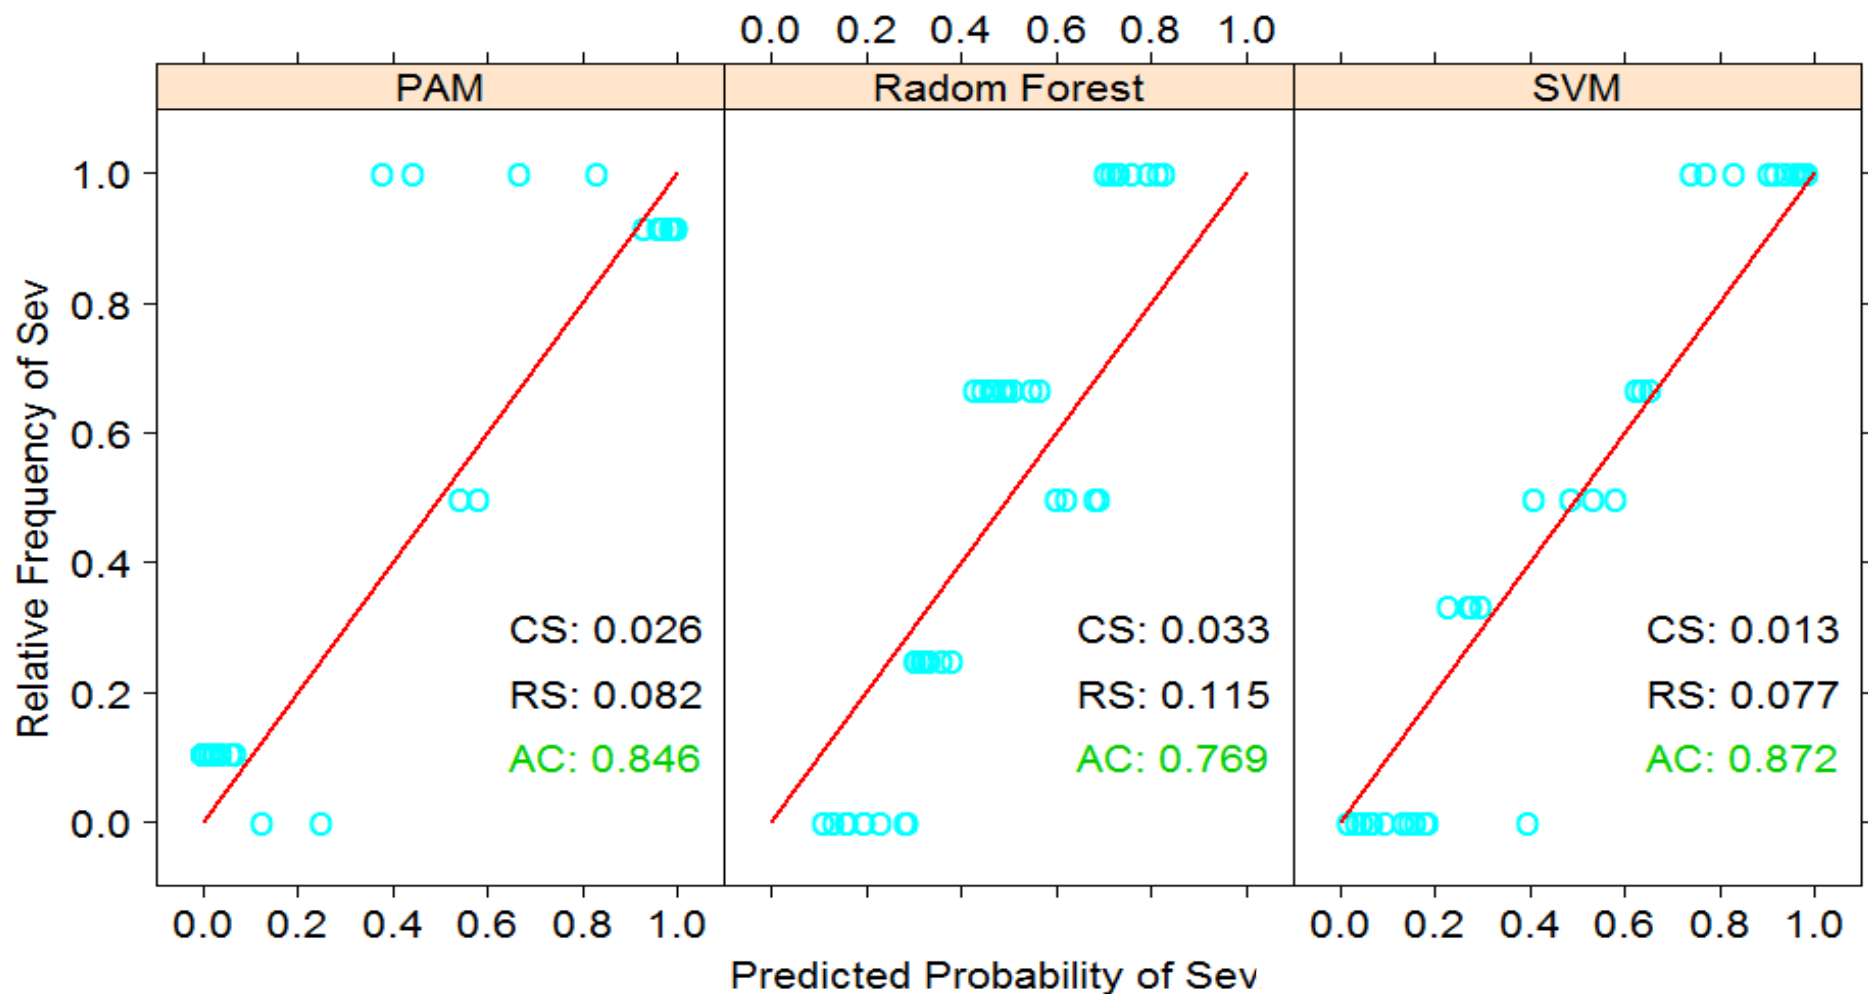

**Figure S3:** A plot of the predicted probabilities and the relative frequencies of severe (Sev). Relative frequencies are computed over 10 bins using binning on the probability interval  $[0, 1]$ . Calibration score (CS), refinement scores (RS) and accuracies (AC) are presented for each classification function. Of the three classification functions, SVM outperforms PAM and RF as the most calibrated and refined.



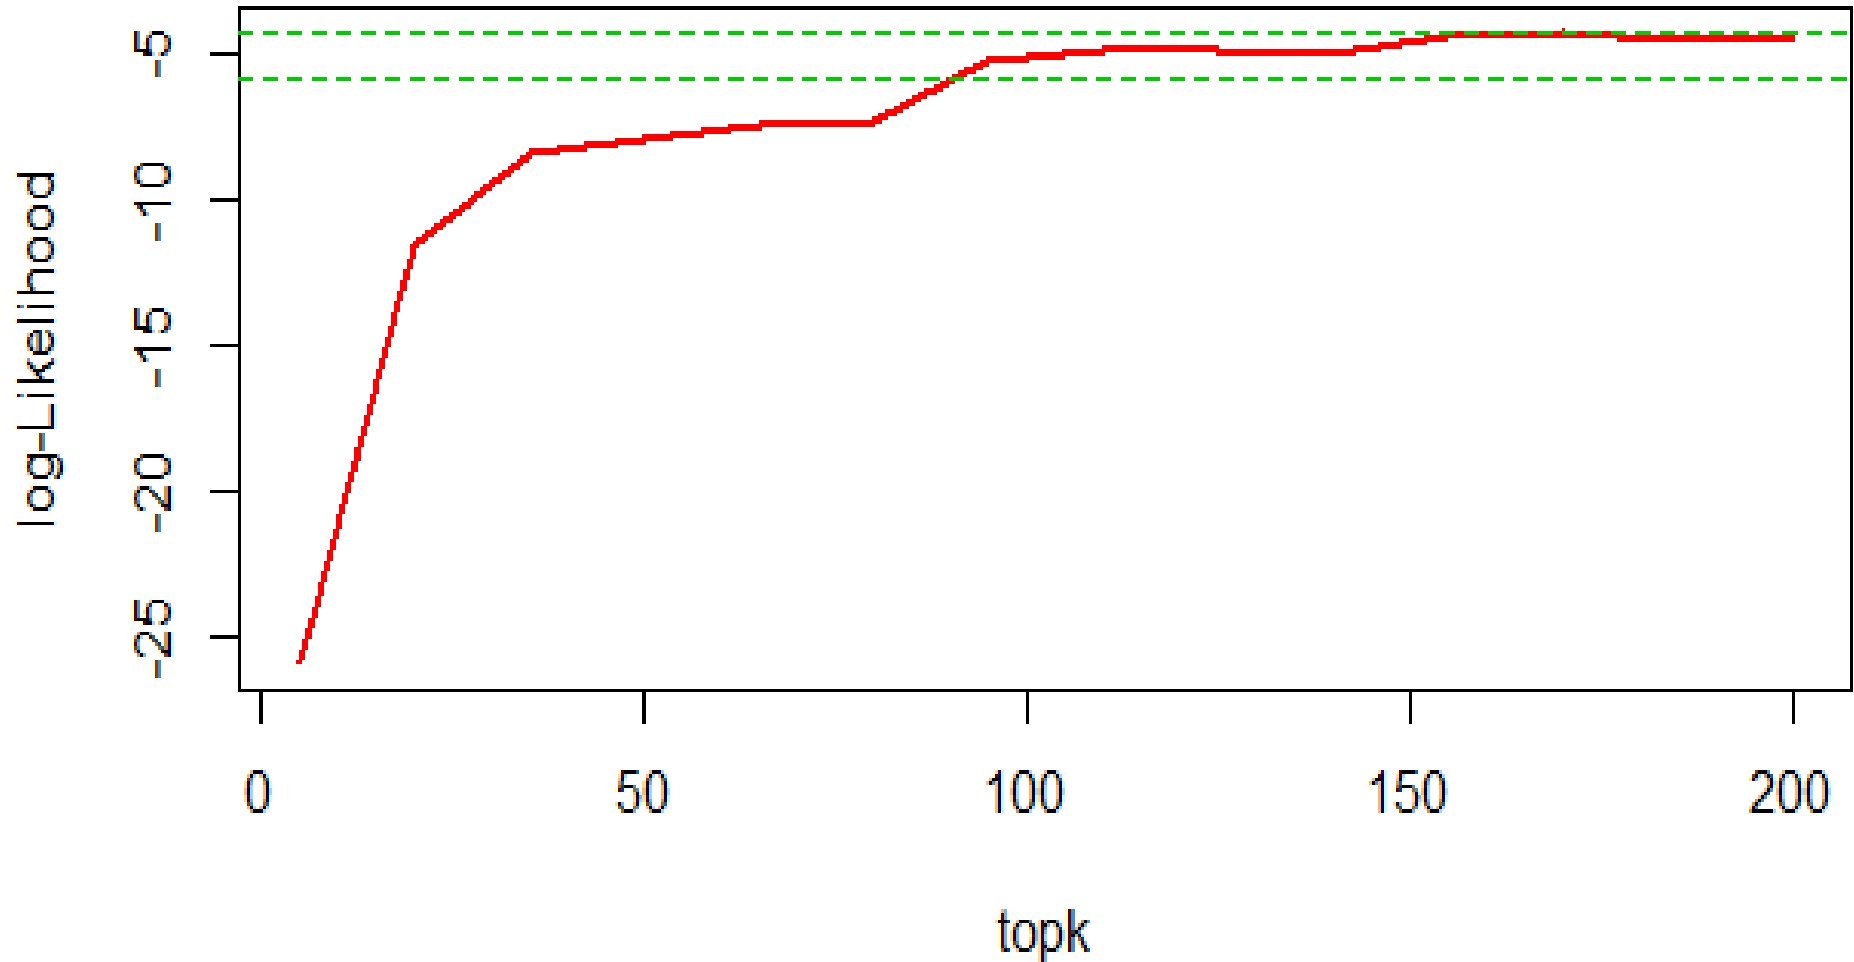

**Figure S4:** To extract the prognostic signature, the same SVM with a linear kernel was built with the entire experimental data and a 5-fold cross-validation for the optimization of the cost parameter. Using the coefficients of the support vectors, the weights of the transcripts were computed and the transcripts were ranked by their absolute weights. The same 5-fold cross-validation used to optimized parameters was used to determine which top number of transcripts yielded a one standard error (1-SE) maximum binomial log-likelihood. The green dotted lines represent the MAX and MAX-1SE of the log-likelihoods. The first value to fall within the band is considered the 1-SE maximum and corresponds to 95 transcripts.

Gene 4 FC: -0.971 & Gene 10 FC: 0.096

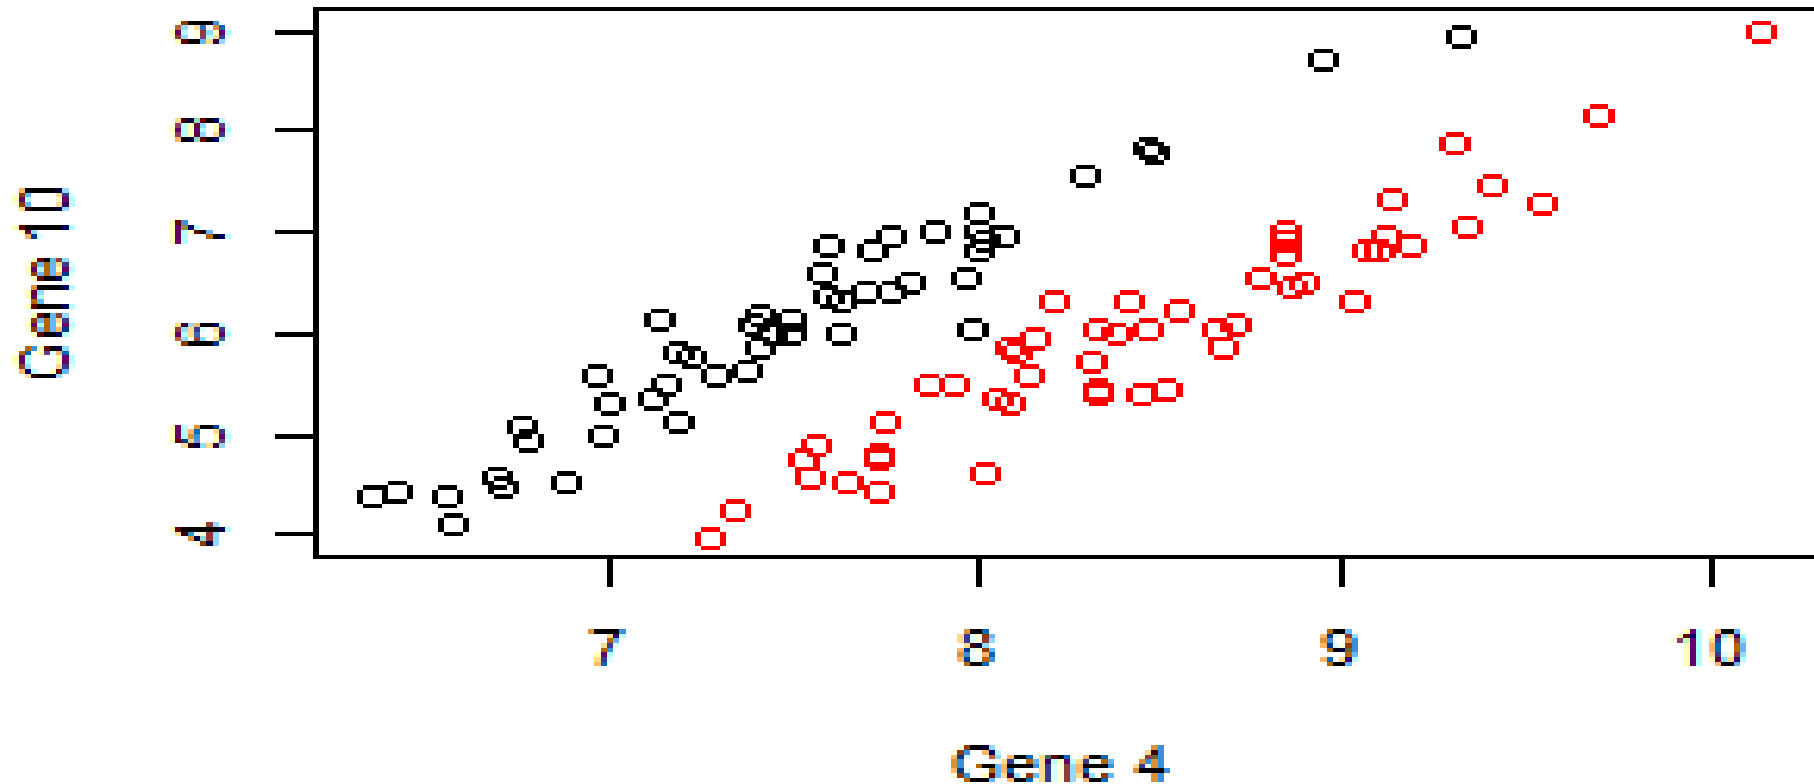

**Figure S5:** A simulated 2-dimensional plot of two genes named Gene 4 and Gene 10 which individually do not separate the groups (black from red). Gene 4 can be considered differentially expressed (DE) with an absolute fold change (FC) of 0.971 but Gene 10 is definitely not DE with a small FC of 0.096 but a combination of the two separates the group almost perfectly. This illustrates the use of non-differentially expressed genes in class discrimination.

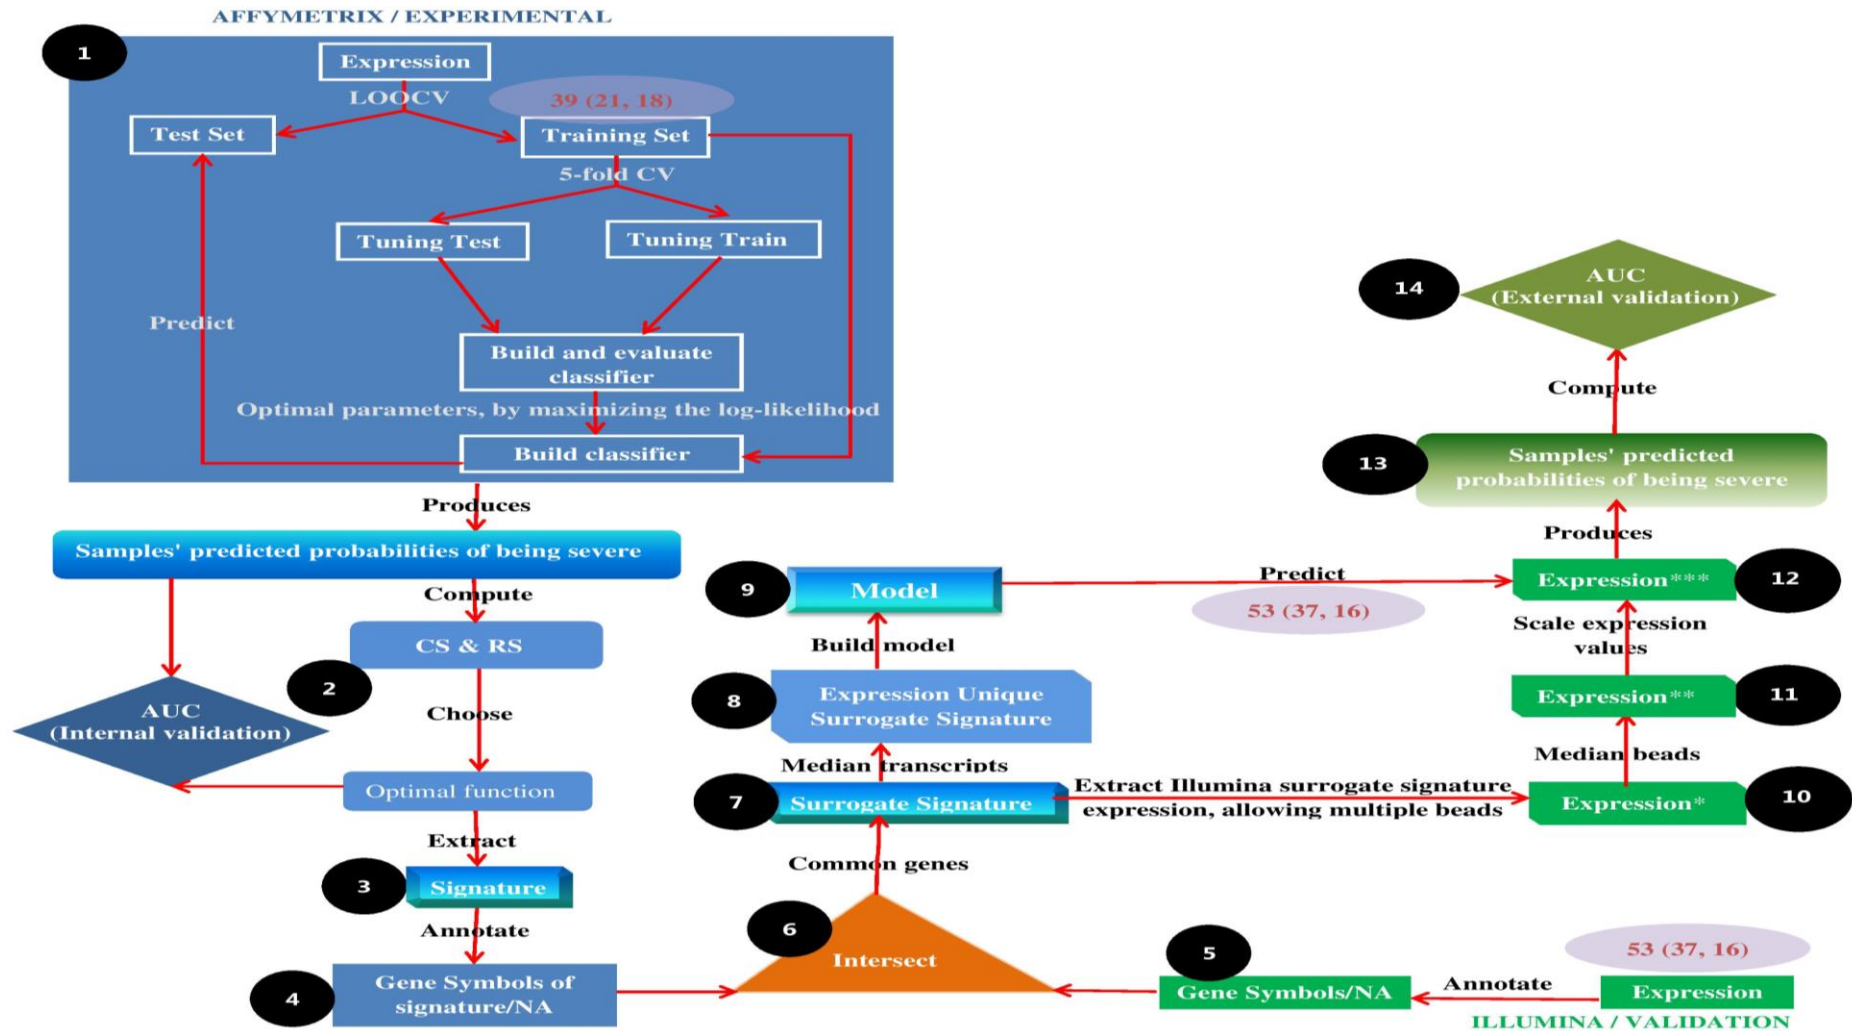

**Figure S6:** Algorithm for building, evaluating and validating the class prediction model. Red numbers in ovals represent total sample sizes, outside brackets and per class sample size in brackets. Blue indicate analysis with Affymetrix data while Green indicate analysis with Illumina data. Where \*: surrogate signature, \*\*: unique surrogate and \*\*\*: scaled unique surrogate signature of Illumina expression values.

**Table S1:** List of genes involved in each and every pathway identified by IPA.

| Categories                                    | # Genes | Genes                                                                                                                                                                                                                                                                                                                                                                                                                                                                                                                                                                                                                                                                                                                                                                                                                                                                                                                                                                                                             |
|-----------------------------------------------|---------|-------------------------------------------------------------------------------------------------------------------------------------------------------------------------------------------------------------------------------------------------------------------------------------------------------------------------------------------------------------------------------------------------------------------------------------------------------------------------------------------------------------------------------------------------------------------------------------------------------------------------------------------------------------------------------------------------------------------------------------------------------------------------------------------------------------------------------------------------------------------------------------------------------------------------------------------------------------------------------------------------------------------|
| <b>Cell-To-Cell Signaling and Interaction</b> | 52      | AHNAK, BCL3, BID, BPI, CARD11, CD1C, CD1E, CD58, CD59, CD63, CEACAM1, CEACAM3, CLEC5A, DOK3, F5, FCAR, FCGR1A, FKBP1A, FPR1, GADD45A, GNAI2, HLA-DMB, HLA-DQB1, HLA-DRA, HLA-DRB1, IGHM, IL1RN, IRF8, KIR3DL1, KLRB1, LAX1, LTB4R, LY96, LYST, MAPK14, MMP9, NFATC2, NFATC3, NFKBIZ, PIK3CB, PLSCR1, PVRL2, RAB27A, RETN, RORA, S100A12, S100A8, SAMSNI, SBNO2, SEMA4A, SLPI, ST6GAL1, STAT3, STAT5B, TNFRSF18                                                                                                                                                                                                                                                                                                                                                                                                                                                                                                                                                                                                    |
| <b>Cell Death and Survival</b>                | 138     | AATK, ABCB1, ACVR1B, ADAM12, ADM, ARG1, B4GALT5, BACH2, BCL3, BHLHE41, BID, BMX, BPI, BTG1, C11orf82, CA4, CAMK2D, CD59, CEACAM1, CFLAR, CLEC5A, CMIP, CREBL2, CTSD, DNASE1L3, DRAM1, E2F1, E2F3, EEF1D, EFHC1, EHD1, EIF3F, EIF4B, ETV6, FCER1A, FCGR1A, FKBP1A, FLNB, FURIN, G0S2, GADD45A, GLTSCR2, GNAI2, GNB2L1, GRB10, HIST1H1C, HRK, HSPA8, IFI16, IGHM, IL10RA, IL1RN, IL23R, IRAK3, IRF8, ITGA7, KDM6B, KIDINS220, KIF1B, KIR3DL1, KLF7, KRAS, LIMK2, LMO2, MAPK14, MEF2C, MGP, MITF, MLLT11, MMP8, MMP9, MTF1, MYBL1, NAIP, NAPA, NBN, NCAM1, NCOA3, NDST1, NFATC1, NFATC2, NFKBIZ, PAFAH2, PALLD, PDLIM7, PDXK, PGLYRP1, PIK3CB, PIM3, PKM, PLSCR1, PPIF, PPP3CC, PRMT2, PTGDS, PVRL2, RAB27A, RASSF6, RBBP4, RHOG, RPL10, S100A8, SAT1, SEMA4A, SH3GLB1, SIGLEC5, SLC25A6, SLC2A3, SLC40A1, SLPI, SMAD5, SOCS3, SOD2, SORT1, SOX5, SPIB, SRPK1, ST6GAL1, STAT3, STAT5B, TCF3, TCF4, TCF7L2, TDRD9, TFPI, TIAM1, TLR6, TNFRSF18, TOP2B, TPD52, TRIM2, UBE2V1, UGCG, XCL1, YY1, ZC3H12A, ZFP36L2, ZMAT3 |
| <b>Cellular Movement</b>                      | 60      | ADM, ARG1, BACH2, BID, CD58, CD63, CEACAM1, CLEC5A, DOCK8, ETV6, F11R, FCAR, FCER1A, FLOT1, FPR1, FYB, GBA, GNAI2, GNB2L1, GPR183, HP, IL10RA, IL17RA, IL1RN, KDM6B, KRAS, LTB4R, LY96, LYST, MAPK14, MLLT11, MMP8, MMP9, NDST1, NFATC1, NFATC2, NFKBIZ, PGLYRP1, PIK3CB, PRMT2, PTGDS, RAB27A, RETN, RPL13A, S100A12, S100A8, SEMA4A, SERPINB1, SLPI, SOCS3, SOD2, STAT3, STAT5B, TET2, TFPI, TIAM1, TNFRSF18, TRIO, XCL1, ZC3H12A                                                                                                                                                                                                                                                                                                                                                                                                                                                                                                                                                                               |
| <b>Cellular Function and Maintenance</b>      | 43      | ABCB1, AHNAK, BACH2, BCL3, BST1, CARD11, CEACAM1, DOCK8, F11R, FCER1A, FCGR1A, FLOT1, FYB, GNAI2, GPR183, GPR84, HLA-DQB1, IGHM, IL10RA, IL23R, IRF8, KLRB1, LAX1, LTB4R, LY96, MMP9, NFATC1, NFATC2, NFKBIZ, RHOG, SAMSNI, SEMA4A, SERPINB1, SH2D1B, SLPI, SPPL2A, ST6GAL1, STAT3, STAT5B, TAPBP, TCF4, TLR6, TNFRSF18                                                                                                                                                                                                                                                                                                                                                                                                                                                                                                                                                                                                                                                                                           |
| <b>Cellular Development</b>                   | 51      | AHNAK, ARG1, B3GNT5, BCL3, CARD11, CD58, CD59, CEACAM1, CFLAR, CTSD, DOCK8, E2F1, FKBP1A, FYB, GADD45A, GNAI2, GPR183, HLA-DQB1, HLA-DRB1, HLA-DRB3, HSPA8, IGHM, IL10RA, IL1RN, IRF8, KLRB1, KRAS, LY96, MAPK14, MEF2C, MMP9, MYBL1, NFATC1, NFATC2, NFATC3, PCYT1A, PIK3CB, PIM3, PLEKHA1, RHOG, SAMSNI, SLPI, SOCS3, SOX5, SPIB, ST6GAL1, STAT3, STAT5B, TCF3, TNFRSF18, XCL1                                                                                                                                                                                                                                                                                                                                                                                                                                                                                                                                                                                                                                  |
| <b>Cellular Growth and Proliferation</b>      | 50      | AHNAK, ARG1, B3GNT5, BCL3, CARD11, CD58, CD59, CEACAM1, CFLAR, CTSD, DOCK8, E2F1, FKBP1A, FYB, GADD45A, GNAI2, GPR183, HLA-DQB1, HLA-DRB1, HLA-DRB3, HSPA8, IGHM, IL1RN, IRF8, KLRB1, KRAS, LY96, MAPK14, MEF2C, MMP9, MYBL1, NFATC1, NFATC2, NFATC3, PCYT1A, PIK3CB, PIM3, PLEKHA1, RHOG, SAMSNI, SLPI, SOCS3, SOX5, SPIB, ST6GAL1, STAT3, STAT5B, TCF3, TNFRSF18, XCL1                                                                                                                                                                                                                                                                                                                                                                                                                                                                                                                                                                                                                                          |
| <b>Protein Synthesis</b>                      | 21      | B3GNT5, BACH2, BCL3, BST1, CARD11, CLEC4D, DOCK8, FCGR1A, GADD45A, GNAI2, HLA-DQB1, IGHM, LAX1, MYBL1, NFATC1, NFATC2, RFTN1, SAMSNI, SPIB, SPPL2A, ZC3H12A                                                                                                                                                                                                                                                                                                                                                                                                                                                                                                                                                                                                                                                                                                                                                                                                                                                       |
| <b>Cellular Compromise</b>                    | 15      | CARD11, CD59, CD96, CEACAM1, CFLAR, DOCK8, FCGR1A, HLA-DRB1, KIR3DL1, KLRB1, NFATC1, NFATC2,                                                                                                                                                                                                                                                                                                                                                                                                                                                                                                                                                                                                                                                                                                                                                                                                                                                                                                                      |

|                                                           |    |                                                                                                                                                                                                                                  |  |
|-----------------------------------------------------------|----|----------------------------------------------------------------------------------------------------------------------------------------------------------------------------------------------------------------------------------|--|
|                                                           |    | RAB27A, STAT5B, XCL1                                                                                                                                                                                                             |  |
| <b>Cell Cycle</b>                                         | 3  | E2F1, PPIF, STAT3                                                                                                                                                                                                                |  |
| <b>Lipid Metabolism</b>                                   | 3  | ABCB1, GBA, UGCG                                                                                                                                                                                                                 |  |
| <b>Small Molecule Biochemistry</b>                        | 3  | ABCB1, GBA, UGCG                                                                                                                                                                                                                 |  |
| <b>Carbohydrate Metabolism</b>                            | 15 | B3GNT8, DYRK2, GRB10, GYG1, HS3ST3B1, IL1RN, KRAS, NDST1, PCYT1A, PPP1R3D, RETN, SOCS3, STAT3, TCF7L2, TNFAIP6                                                                                                                   |  |
| <b>Cell Morphology</b>                                    | 15 | ABCB1, B3GNT5, BACH2, BCL3, CARD11, E2F1, HLA-DQB1, IGHM, IL1RN, IRF8, LYST, NFKBIZ, SPIB, STAT5B, TCF3                                                                                                                          |  |
| <b>Antigen Presentation</b>                               | 9  | CD1C, CD1E, CLEC4D, CTSD, FCGR1A, IGHM, MAPK14, SEMA4A, TAPBP                                                                                                                                                                    |  |
| <b>Drug Metabolism</b>                                    | 2  | ABCB1, UGCG                                                                                                                                                                                                                      |  |
| <b>Molecular transport</b>                                | 2  | ABCB1, UGCG                                                                                                                                                                                                                      |  |
| <b>DNA Replication, Recombination, and Repair</b>         | 13 | BCL3, C11orf82, DYRK2, GADD45A, IFI16, NABP1, NBN, NFATC2, SESN1, SP100, USP28, YY1, ZBTB4                                                                                                                                       |  |
| <b>Gene Expression</b>                                    | 33 | ACVR1B, ADAM12, BCL3, CRIM1, E2F1, E2F3, ETV6, FGF13, GADD45A, IFI16, IRF8, LMO2, MAPK14, MEF2C, MITF, MMP9, MYBL1, NCOA3, NFATC1, NFATC2, NFE2, PRMT2, RORA, SOCS3, SPIB, STAT3, STAT5B, TCF3, TCF4, TCF7L2, TGIF1, YY1, ZBTB10 |  |
| <b>Amino Acid Metabolism, Small Molecule Biochemistry</b> | 2  | ARG1, GLS                                                                                                                                                                                                                        |  |
| <b>Cellular Assembly and Organization</b>                 | 2  | NAPA, STXBP3                                                                                                                                                                                                                     |  |
| <b>Cell Signaling</b>                                     | 21 | BCL3, CARD11, EEF1D, FGF13, FKBP1A, GADD45A, GNAI2, GRB2, IGHM, IL23R, MEF2C, NDST1, RORA, S100A12, SECTM1, SOCS3, STAT3, STAT5B, TLE1, TLR6, UBE2V1                                                                             |  |
| <b>Energy Production</b>                                  | 7  | G0S2, KRAS, PID1, PKM, PPIF, SOCS3, STAT3                                                                                                                                                                                        |  |
| <b>Nucleic Acid Metabolism</b>                            | 7  | G0S2, KRAS, PID1, PKM, PPIF, SOCS3, STAT3                                                                                                                                                                                        |  |

**Table S2:** Differentially expressed transcripts for the three contrasts and those that were included in the prognostic signature (shaded in green)

| N° | Probeset    | Mod - Mil |       | Sev -Mil |       | Sev - Mod |       | Sev-(Mil & Mod) |       | Pred. Sign. |
|----|-------------|-----------|-------|----------|-------|-----------|-------|-----------------|-------|-------------|
|    |             | LFC       | Adj.P | LFC      | Adj.P | LFC       | Adj.P | LFC             | Adj.P |             |
| 1  | 206871_at   | 0.808     | 0.952 | 3.627    | 0.000 | 2.819     | 0.000 | 3.223           | 0.000 | YES         |
| 2  | 203949_at   | 0.804     | 0.952 | 3.163    | 0.000 | 2.359     | 0.000 | 2.761           | 0.000 | YES         |
| 3  | 211657_at   | 0.892     | 0.952 | 3.177    | 0.000 | 2.285     | 0.000 | 2.731           | 0.000 | YES         |
| 4  | 207269_at   | 1.284     | 0.952 | 4.025    | 0.000 | 2.741     | 0.001 | 3.383           | 0.000 | YES         |
| 5  | 205557_at   | 0.777     | 0.952 | 2.951    | 0.000 | 2.174     | 0.000 | 2.562           | 0.000 | YES         |
| 6  | 203757_s_at | 1.041     | 0.952 | 3.347    | 0.000 | 2.306     | 0.001 | 2.827           | 0.000 | YES         |
| 7  | 203948_s_at | 0.828     | 0.952 | 3.073    | 0.000 | 2.245     | 0.001 | 2.659           | 0.000 | YES         |
| 8  | 231688_at   | 1.574     | 0.952 | 3.815    | 0.000 | 2.241     | 0.004 | 3.028           | 0.000 | YES         |
| 9  | 207341_at   | 0.352     | 0.957 | 2.114    | 0.000 | 1.762     | 0.000 | 1.938           | 0.000 | YES         |
| 10 | 207384_at   | 0.522     | 0.952 | 2.339    | 0.000 | 1.818     | 0.001 | 2.079           | 0.000 | YES         |
| 11 | 212531_at   | 0.965     | 0.952 | 3.004    | 0.000 | 2.038     | 0.002 | 2.521           | 0.000 | YES         |
| 12 | 207329_at   | 1.173     | 0.952 | 3.537    | 0.000 | 2.364     | 0.002 | 2.950           | 0.000 | YES         |
| 13 | 206676_at   | 1.145     | 0.952 | 3.689    | 0.000 | 2.545     | 0.002 | 3.117           | 0.000 | YES         |
| 14 | 227140_at   | 0.219     | 0.960 | 1.401    | 0.001 | 1.182     | 0.001 | 1.291           | 0.000 | YES         |
| 15 | 210254_at   | 0.740     | 0.952 | 2.712    | 0.000 | 1.972     | 0.002 | 2.342           | 0.000 | YES         |
| 16 | 214575_s_at | 0.427     | 0.957 | 2.326    | 0.001 | 1.900     | 0.001 | 2.113           | 0.000 | YES         |
| 17 | 220570_at   | 0.347     | 0.960 | 2.068    | 0.001 | 1.721     | 0.001 | 1.895           | 0.000 | YES         |
| 18 | 203021_at   | 0.515     | 0.952 | 2.038    | 0.001 | 1.523     | 0.002 | 1.781           | 0.000 | YES         |
| 19 | 202018_s_at | 1.284     | 0.952 | 3.405    | 0.000 | 2.121     | 0.009 | 2.763           | 0.000 | YES         |
| 20 | 206851_at   | 0.624     | 0.952 | 1.877    | 0.000 | 1.252     | 0.006 | 1.565           | 0.000 | YES         |
| 21 | 205653_at   | 0.562     | 0.952 | 2.089    | 0.001 | 1.527     | 0.004 | 1.808           | 0.000 | YES         |
| 22 | 235816_s_at | 0.337     | 0.952 | 1.279    | 0.001 | 0.942     | 0.004 | 1.111           | 0.000 | NO          |
| 23 | 205033_s_at | 1.043     | 0.952 | 2.876    | 0.000 | 1.833     | 0.010 | 2.354           | 0.000 | NO          |
| 24 | 203936_s_at | 1.242     | 0.952 | 2.736    | 0.000 | 1.494     | 0.022 | 2.115           | 0.000 | YES         |
| 25 | 212768_s_at | 2.289     | 0.952 | 4.408    | 0.000 | 2.119     | 0.051 | 3.264           | 0.000 | YES         |
| 26 | 225782_at   | 0.335     | 0.952 | 1.395    | 0.001 | 1.060     | 0.004 | 1.228           | 0.000 | NO          |
| 27 | 231093_at   | 0.156     | 0.967 | -0.893   | 0.014 | -1.050    | 0.001 | -0.972          | 0.000 | YES         |
| 28 | 205513_at   | 0.985     | 0.952 | 2.428    | 0.001 | 1.443     | 0.020 | 1.936           | 0.000 | YES         |
| 29 | 219890_at   | 0.906     | 0.952 | 1.817    | 0.000 | 0.911     | 0.054 | 1.364           | 0.000 | NO          |

| N° | Probeset     | Mod - Mil |       | Sev -Mil |       | Sev - Mod |       | Sev-(Mil & Mod) |       | Pred. Sign. |
|----|--------------|-----------|-------|----------|-------|-----------|-------|-----------------|-------|-------------|
|    |              | LFC       | Adj.P | LFC      | Adj.P | LFC       | Adj.P | LFC             | Adj.P |             |
| 30 | 226188_at    | 0.279     | 0.952 | 1.097    | 0.002 | 0.818     | 0.008 | 0.958           | 0.000 | NO          |
| 31 | 206208_at    | 0.525     | 0.952 | 1.205    | 0.001 | 0.680     | 0.031 | 0.942           | 0.000 | NO          |
| 32 | 214539_at    | 0.353     | 0.953 | 1.479    | 0.003 | 1.126     | 0.008 | 1.303           | 0.000 | YES         |
| 33 | 231122_x_at  | 0.381     | 0.953 | 1.588    | 0.003 | 1.207     | 0.008 | 1.398           | 0.000 | YES         |
| 34 | 202286_s_at  | -0.133    | 0.987 | 1.616    | 0.014 | 1.749     | 0.001 | 1.682           | 0.000 | YES         |
| 35 | 213541_s_at  | 0.233     | 0.953 | 1.045    | 0.003 | 0.813     | 0.008 | 0.929           | 0.000 | NO          |
| 36 | 209651_at    | 0.010     | 0.998 | 1.019    | 0.010 | 1.009     | 0.002 | 1.014           | 0.000 | YES         |
| 37 | 223767_at    | 0.746     | 0.952 | 2.043    | 0.002 | 1.297     | 0.020 | 1.670           | 0.000 | YES         |
| 38 | 206464_at    | 0.599     | 0.952 | 1.488    | 0.001 | 0.889     | 0.029 | 1.188           | 0.000 | NO          |
| 39 | 207802_at    | 0.768     | 0.952 | 2.656    | 0.003 | 1.888     | 0.014 | 2.272           | 0.000 | YES         |
| 40 | 200696_s_at  | 0.198     | 0.959 | 1.006    | 0.005 | 0.808     | 0.008 | 0.907           | 0.000 | NO          |
| 41 | 209498_at    | 1.098     | 0.952 | 2.180    | 0.001 | 1.082     | 0.080 | 1.631           | 0.001 | YES         |
| 42 | 225207_at    | -0.231    | 0.967 | 1.461    | 0.008 | 1.231     | 0.008 | 1.346           | 0.000 | YES         |
| 43 | 1554892_a_at | 0.711     | 0.952 | 2.403    | 0.004 | 1.692     | 0.017 | 2.048           | 0.000 | YES         |
| 44 | 220496_at    | 0.239     | 0.962 | 1.322    | 0.007 | 1.082     | 0.009 | 1.202           | 0.000 | YES         |
| 45 | 1553952_at   | 0.217     | 0.958 | 1.010    | 0.007 | 0.793     | 0.013 | 0.901           | 0.000 | NO          |
| 46 | 1553605_a_at | 0.355     | 0.959 | 1.704    | 0.007 | 1.349     | 0.013 | 1.527           | 0.000 | YES         |
| 47 | 203725_at    | 0.297     | 0.952 | 1.056    | 0.005 | 0.760     | 0.018 | 0.908           | 0.000 | NO          |
| 48 | 206440_at    | 0.545     | 0.952 | 1.229    | 0.003 | 0.684     | 0.065 | 0.956           | 0.001 | NO          |
| 49 | 1553177_at   | -0.241    | 0.957 | 1.079    | 0.008 | 0.838     | 0.015 | 0.959           | 0.001 | YES         |
| 50 | 206697_s_at  | 1.057     | 0.952 | 2.333    | 0.003 | 1.277     | 0.069 | 1.805           | 0.001 | YES         |
| 51 | 206655_s_at  | -0.075    | 0.993 | 1.125    | 0.023 | 1.200     | 0.005 | 1.163           | 0.001 | NO          |
| 52 | 208470_s_at  | 1.178     | 0.952 | 2.537    | 0.003 | 1.359     | 0.079 | 1.948           | 0.001 | NO          |
| 53 | 220001_at    | 0.443     | 0.952 | 1.412    | 0.006 | 0.969     | 0.026 | 1.191           | 0.001 | NO          |
| 54 | 206209_s_at  | 0.600     | 0.952 | 1.305    | 0.003 | 0.705     | 0.077 | 1.005           | 0.001 | NO          |
| 55 | 227297_at    | 0.273     | 0.957 | 1.188    | 0.008 | 0.915     | 0.017 | 1.051           | 0.001 | NO          |
| 56 | 238983_at    | 0.632     | 0.952 | 1.238    | 0.003 | 0.606     | 0.113 | 0.922           | 0.001 | NO          |

| N° | Probeset    | Mod - Mil |       | Sev -Mil |       | Sev - Mod |       | Sev-(Mil & Mod) |       | Pred. Sign. |
|----|-------------|-----------|-------|----------|-------|-----------|-------|-----------------|-------|-------------|
|    |             | LFC       | Adj.P | LFC      | Adj.P | LFC       | Adj.P | LFC             | Adj.P |             |
| 57 | 241652_x_at | 0.594     | 0.952 | 1.291    | 0.003 | 0.697     | 0.081 | 0.994           | 0.001 | NO          |
| 58 | 205040_at   | 0.651     | 0.952 | 2.312    | 0.008 | 1.661     | 0.025 | 1.986           | 0.001 | YES         |
| 59 | 205110_s_at | 0.647     | 0.952 | 1.709    | 0.006 | 1.062     | 0.054 | 1.386           | 0.001 | YES         |
| 60 | 205041_s_at | 0.777     | 0.952 | 2.660    | 0.008 | 1.882     | 0.031 | 2.271           | 0.001 | NO          |
| 61 | 205627_at   | 0.413     | 0.952 | 1.280    | 0.008 | 0.867     | 0.040 | 1.074           | 0.001 | NO          |
| 62 | 202252_at   | 0.296     | 0.952 | 1.034    | 0.008 | 0.737     | 0.031 | 0.885           | 0.001 | NO          |
| 63 | 201061_s_at | 0.490     | 0.952 | 1.243    | 0.007 | 0.753     | 0.068 | 0.998           | 0.002 | NO          |
| 64 | 200999_s_at | 0.443     | 0.952 | 1.100    | 0.007 | 0.658     | 0.072 | 0.879           | 0.002 | NO          |
| 65 | 209823_x_at | -0.338    | 0.952 | -1.149   | 0.010 | -0.810    | 0.040 | -0.979          | 0.001 | NO          |
| 66 | 229934_at   | 0.731     | 0.952 | 1.249    | 0.005 | 0.518     | 0.232 | 0.884           | 0.003 | NO          |
| 67 | 220000_at   | 0.605     | 0.952 | 1.429    | 0.007 | 0.825     | 0.086 | 1.127           | 0.002 | YES         |
| 68 | 211889_x_at | 0.637     | 0.952 | 1.599    | 0.008 | 0.962     | 0.076 | 1.280           | 0.002 | YES         |
| 69 | 211883_x_at | 0.728     | 0.952 | 1.587    | 0.007 | 0.859     | 0.110 | 1.223           | 0.002 | NO          |
| 70 | 222071_s_at | 0.369     | 0.952 | 1.088    | 0.010 | 0.719     | 0.058 | 0.903           | 0.002 | NO          |
| 71 | 202948_at   | 0.586     | 0.952 | 1.445    | 0.008 | 0.859     | 0.080 | 1.152           | 0.002 | NO          |
| 72 | 216956_s_at | -0.267    | 0.958 | 0.791    | 0.080 | 1.058     | 0.008 | 0.924           | 0.004 | YES         |
| 73 | 211372_s_at | 0.843     | 0.952 | 1.855    | 0.007 | 1.012     | 0.115 | 1.433           | 0.003 | NO          |
| 74 | 208168_s_at | 0.234     | 0.959 | 1.040    | 0.015 | 0.806     | 0.032 | 0.923           | 0.002 | YES         |
| 75 | 220646_s_at | -0.217    | 0.965 | -1.071   | 0.017 | -0.854    | 0.030 | -0.962          | 0.002 | NO          |
| 76 | 235764_at   | 0.665     | 0.952 | 1.313    | 0.007 | 0.648     | 0.162 | 0.981           | 0.003 | NO          |
| 77 | 217977_at   | 0.468     | 0.952 | 1.044    | 0.008 | 0.575     | 0.116 | 0.809           | 0.003 | NO          |
| 78 | 227929_at   | 0.662     | 0.952 | 1.318    | 0.007 | 0.656     | 0.161 | 0.987           | 0.003 | NO          |
| 79 | 227889_at   | 0.759     | 0.952 | 1.241    | 0.007 | 0.483     | 0.294 | 0.862           | 0.005 | NO          |
| 80 | 201060_x_at | 0.592     | 0.952 | 1.242    | 0.008 | 0.650     | 0.144 | 0.946           | 0.003 | NO          |
| 81 | 205403_at   | 1.014     | 0.952 | 2.014    | 0.008 | 1.000     | 0.165 | 1.507           | 0.004 | NO          |
| 82 | 204614_at   | 0.447     | 0.952 | 1.108    | 0.010 | 0.661     | 0.096 | 0.884           | 0.003 | NO          |
| 83 | 206493_at   | -0.075    | 0.994 | 1.119    | 0.046 | 1.194     | 0.016 | 1.156           | 0.004 | YES         |
| 84 | 205863_at   | 0.550     | 0.952 | 1.501    | 0.011 | 0.951     | 0.079 | 1.226           | 0.003 | NO          |
| 85 | 226726_at   | 0.471     | 0.952 | 1.101    | 0.010 | 0.630     | 0.111 | 0.866           | 0.003 | NO          |

| N°  | Probeset    | Mod - Mil |       | Sev -Mil |       | Sev - Mod |       | Sev-(Mil & Mod) |       | Pred. Sign. |
|-----|-------------|-----------|-------|----------|-------|-----------|-------|-----------------|-------|-------------|
|     |             | LFC       | Adj.P | LFC      | Adj.P | LFC       | Adj.P | LFC             | Adj.P |             |
| 86  | 224480_s_at | 0.554     | 0.952 | 1.015    | 0.008 | 0.461     | 0.215 | 0.738           | 0.005 | NO          |
| 87  | 206576_s_at | 0.660     | 0.952 | 1.616    | 0.010 | 0.956     | 0.101 | 1.286           | 0.003 | NO          |
| 88  | 240027_at   | 0.490     | 0.952 | 1.121    | 0.010 | 0.631     | 0.123 | 0.876           | 0.003 | NO          |
| 89  | 222833_at   | 0.536     | 0.952 | 1.025    | 0.008 | 0.489     | 0.194 | 0.757           | 0.004 | NO          |
| 90  | 215118_s_at | 0.070     | 0.994 | -1.230   | 0.047 | -1.300    | 0.017 | -1.265          | 0.004 | YES         |
| 91  | 206177_s_at | 0.527     | 0.957 | 2.065    | 0.017 | 1.539     | 0.052 | 1.802           | 0.003 | YES         |
| 92  | 1553518_at  | 0.187     | 0.977 | 1.224    | 0.024 | 1.037     | 0.032 | 1.130           | 0.003 | NO          |
| 93  | 228648_at   | 0.956     | 0.952 | 1.567    | 0.008 | 0.611     | 0.318 | 1.089           | 0.007 | NO          |
| 94  | 214465_at   | 0.353     | 0.953 | 1.167    | 0.016 | 0.813     | 0.068 | 0.990           | 0.003 | NO          |
| 95  | 220615_s_at | 0.532     | 0.952 | 1.089    | 0.010 | 0.556     | 0.173 | 0.822           | 0.005 | NO          |
| 96  | 37145_at    | -0.191    | 0.977 | -1.232   | 0.026 | -1.041    | 0.037 | -1.136          | 0.004 | NO          |
| 97  | 206157_at   | 0.177     | 0.969 | 1.010    | 0.024 | 0.834     | 0.041 | 0.922           | 0.004 | NO          |
| 98  | 209369_at   | 1.156     | 0.952 | 2.124    | 0.009 | 0.968     | 0.231 | 1.546           | 0.006 | YES         |
| 99  | 206522_at   | 1.104     | 0.952 | 1.644    | 0.008 | 0.541     | 0.430 | 1.093           | 0.011 | NO          |
| 100 | 1553604_at  | 0.309     | 0.953 | 1.103    | 0.018 | 0.794     | 0.065 | 0.948           | 0.004 | NO          |
| 101 | 213478_at   | 0.347     | 0.952 | 1.075    | 0.016 | 0.728     | 0.077 | 0.901           | 0.004 | NO          |
| 102 | 205495_s_at | -0.208    | 0.974 | -1.254   | 0.027 | -1.046    | 0.042 | -1.150          | 0.004 | NO          |
| 103 | 1560527_at  | 0.907     | 0.952 | 1.332    | 0.009 | 0.425     | 0.455 | 0.878           | 0.013 | NO          |
| 104 | 211275_s_at | 0.487     | 0.952 | 1.126    | 0.012 | 0.638     | 0.140 | 0.882           | 0.005 | NO          |
| 105 | 210244_at   | 0.779     | 0.952 | 1.778    | 0.012 | 0.999     | 0.145 | 1.389           | 0.005 | YES         |
| 106 | 232958_at   | 0.655     | 0.952 | 1.233    | 0.010 | 0.577     | 0.227 | 0.905           | 0.006 | NO          |
| 107 | 200998_s_at | 0.321     | 0.952 | 1.009    | 0.018 | 0.688     | 0.079 | 0.848           | 0.004 | NO          |
| 108 | 1553723_at  | 0.767     | 0.952 | 1.380    | 0.010 | 0.613     | 0.258 | 0.997           | 0.007 | NO          |
| 109 | 218660_at   | 0.627     | 0.952 | 1.210    | 0.011 | 0.583     | 0.219 | 0.897           | 0.007 | NO          |
| 110 | 219938_s_at | 0.452     | 0.952 | 1.056    | 0.014 | 0.604     | 0.145 | 0.830           | 0.005 | NO          |
| 111 | 221485_at   | 0.570     | 0.952 | 1.084    | 0.011 | 0.514     | 0.227 | 0.799           | 0.007 | NO          |
| 112 | 209238_at   | 0.610     | 0.952 | 1.060    | 0.010 | 0.450     | 0.292 | 0.755           | 0.009 | NO          |
| 113 | 210004_at   | 0.436     | 0.952 | 1.358    | 0.019 | 0.922     | 0.086 | 1.140           | 0.005 | YES         |
| 114 | 201110_s_at | -0.277    | 0.960 | 0.778    | 0.122 | 1.056     | 0.017 | 0.917           | 0.010 | NO          |

| N°  | Probeset     | Mod - Mil |       | Sev -Mil |       | Sev - Mod |       | Sev-(Mil & Mod) |       | Pred. Sign. |
|-----|--------------|-----------|-------|----------|-------|-----------|-------|-----------------|-------|-------------|
|     |              | LFC       | Adj.P | LFC      | Adj.P | LFC       | Adj.P | LFC             | Adj.P |             |
| 115 | 203814_s_at  | 0.377     | 0.952 | 1.114    | 0.019 | 0.737     | 0.098 | 0.925           | 0.005 | NO          |
| 116 | 1562289_at   | 0.421     | 0.952 | 1.251    | 0.020 | 0.830     | 0.098 | 1.040           | 0.005 | NO          |
| 117 | 209395_at    | 1.626     | 0.952 | 2.468    | 0.011 | 0.843     | 0.436 | 1.656           | 0.014 | YES         |
| 118 | 206494_s_at  | -0.145    | 0.985 | 1.069    | 0.077 | 1.215     | 0.024 | 1.142           | 0.008 | YES         |
| 119 | 201554_x_at  | 0.452     | 0.952 | 1.135    | 0.017 | 0.682     | 0.136 | 0.908           | 0.006 | NO          |
| 120 | 202391_at    | 0.634     | 0.952 | 1.070    | 0.012 | 0.435     | 0.334 | 0.752           | 0.011 | NO          |
| 121 | 211734_s_at  | -0.325    | 0.953 | -1.045   | 0.022 | -0.720    | 0.091 | -0.883          | 0.006 | YES         |
| 122 | 231886_at    | 0.802     | 0.952 | 1.236    | 0.012 | 0.434     | 0.432 | 0.835           | 0.015 | NO          |
| 123 | 266_s_at     | 0.272     | 0.958 | 1.022    | 0.027 | 0.750     | 0.081 | 0.886           | 0.006 | NO          |
| 124 | 227236_at    | 0.378     | 0.952 | 1.010    | 0.020 | 0.632     | 0.132 | 0.821           | 0.007 | NO          |
| 125 | 220945_x_at  | 0.982     | 0.952 | 1.227    | 0.014 | 0.245     | 0.708 | 0.736           | 0.035 | NO          |
| 126 | 220404_at    | 0.684     | 0.952 | 1.267    | 0.015 | 0.583     | 0.272 | 0.925           | 0.011 | NO          |
| 127 | 223836_at    | -0.296    | 0.965 | -1.326   | 0.033 | -1.031    | 0.075 | -1.178          | 0.007 | YES         |
| 128 | 220088_at    | 0.551     | 0.952 | 1.025    | 0.016 | 0.474     | 0.276 | 0.750           | 0.011 | NO          |
| 129 | 206641_at    | -0.009    | 0.999 | -1.168   | 0.062 | -1.159    | 0.045 | -1.164          | 0.009 | YES         |
| 130 | 206111_at    | 0.497     | 0.952 | 1.295    | 0.022 | 0.798     | 0.146 | 1.047           | 0.008 | NO          |
| 131 | 228285_at    | 0.619     | 0.952 | 1.289    | 0.018 | 0.670     | 0.219 | 0.979           | 0.010 | NO          |
| 132 | 220416_at    | 0.429     | 0.952 | 1.103    | 0.022 | 0.673     | 0.154 | 0.888           | 0.009 | NO          |
| 133 | 206515_at    | 1.055     | 0.952 | 1.475    | 0.016 | 0.420     | 0.557 | 0.948           | 0.025 | NO          |
| 134 | 224412_s_at  | 0.832     | 0.952 | 1.209    | 0.016 | 0.377     | 0.513 | 0.793           | 0.022 | NO          |
| 135 | 220603_s_at  | 0.605     | 0.952 | 1.068    | 0.017 | 0.463     | 0.325 | 0.765           | 0.014 | NO          |
| 136 | 202499_s_at  | 0.596     | 0.952 | 1.028    | 0.017 | 0.433     | 0.345 | 0.730           | 0.015 | NO          |
| 137 | 209396_s_at  | 1.495     | 0.952 | 2.210    | 0.016 | 0.715     | 0.497 | 1.463           | 0.022 | YES         |
| 138 | 227250_at    | 0.910     | 0.952 | 1.291    | 0.017 | 0.381     | 0.548 | 0.836           | 0.027 | NO          |
| 139 | 230083_at    | -0.659    | 0.952 | -1.015   | 0.017 | -0.356    | 0.460 | -0.685          | 0.021 | NO          |
| 140 | 1556185_a_at | 0.955     | 0.952 | 1.273    | 0.018 | 0.318     | 0.633 | 0.796           | 0.034 | NO          |
| 141 | 224707_at    | 0.863     | 0.952 | 1.530    | 0.019 | 0.667     | 0.335 | 1.099           | 0.015 | NO          |
| 142 | 215223_s_at  | 0.679     | 0.952 | 1.158    | 0.018 | 0.480     | 0.364 | 0.819           | 0.017 | NO          |
| 143 | 229967_at    | 0.771     | 0.952 | 1.409    | 0.020 | 0.637     | 0.313 | 1.023           | 0.015 | NO          |

| N°  | Probeset    | Mod - Mil |       | Sev -Mil |       | Sev - Mod |       | Sev-(Mil & Mod) |       | Pred. Sign. |
|-----|-------------|-----------|-------|----------|-------|-----------|-------|-----------------|-------|-------------|
|     |             | LFC       | Adj.P | LFC      | Adj.P | LFC       | Adj.P | LFC             | Adj.P |             |
| 144 | 211413_s_at | 0.323     | 0.955 | 1.079    | 0.033 | 0.756     | 0.121 | 0.917           | 0.010 | NO          |
| 145 | 207890_s_at | 0.540     | 0.952 | 1.142    | 0.022 | 0.603     | 0.231 | 0.873           | 0.013 | NO          |
| 146 | 208650_s_at | 0.405     | 0.952 | 1.164    | 0.030 | 0.760     | 0.146 | 0.962           | 0.011 | NO          |
| 147 | 225612_s_at | 0.605     | 0.952 | 1.115    | 0.020 | 0.510     | 0.312 | 0.813           | 0.016 | NO          |
| 148 | 215783_s_at | 0.705     | 0.952 | 1.468    | 0.022 | 0.763     | 0.242 | 1.115           | 0.013 | NO          |
| 149 | 209930_s_at | 0.503     | 0.952 | 1.009    | 0.022 | 0.506     | 0.262 | 0.757           | 0.014 | NO          |
| 150 | 226064_s_at | 0.572     | 0.952 | 1.019    | 0.020 | 0.446     | 0.344 | 0.733           | 0.017 | NO          |
| 151 | 207674_at   | 0.688     | 0.952 | 1.210    | 0.020 | 0.522     | 0.352 | 0.866           | 0.017 | NO          |
| 152 | 225987_at   | 0.670     | 0.952 | 1.157    | 0.020 | 0.487     | 0.366 | 0.822           | 0.018 | NO          |
| 153 | 224327_s_at | 0.546     | 0.952 | 1.020    | 0.022 | 0.475     | 0.311 | 0.747           | 0.016 | NO          |
| 154 | 208450_at   | 0.204     | 0.984 | -1.297   | 0.114 | -1.501    | 0.048 | -1.399          | 0.016 | YES         |
| 155 | 211163_s_at | 0.919     | 0.952 | 1.254    | 0.020 | 0.334     | 0.615 | 0.794           | 0.036 | NO          |
| 156 | 204731_at   | -0.254    | 0.962 | -1.020   | 0.042 | -0.765    | 0.109 | -0.892          | 0.012 | NO          |
| 157 | 229228_at   | 0.822     | 0.952 | 1.133    | 0.022 | 0.310     | 0.607 | 0.722           | 0.038 | NO          |
| 158 | 203290_at   | 0.388     | 0.981 | 1.631    | 0.220 | 2.019     | 0.107 | 1.825           | 0.050 | YES         |
| 159 | 209480_at   | -0.050    | 0.998 | 0.945    | 0.602 | 0.995     | 0.616 | 0.970           | 0.445 | YES         |
| 160 | 238439_at   | 0.735     | 0.952 | 1.709    | 0.040 | 0.974     | 0.253 | 1.341           | 0.022 | YES         |
| 161 | 227474_at   | 0.399     | 0.954 | -0.278   | 0.702 | -0.677    | 0.291 | -0.477          | 0.307 | YES         |
| 162 | 41469_at    | -0.016    | 0.998 | 0.862    | 0.177 | 0.878     | 0.162 | 0.870           | 0.053 | YES         |
| 163 | 203691_at   | 0.070     | 0.994 | 0.921    | 0.127 | 0.852     | 0.154 | 0.886           | 0.038 | YES         |
| 164 | 218876_at   | 0.245     | 0.952 | -0.538   | 0.048 | -0.783    | 0.001 | -0.661          | 0.001 | YES         |
| 165 | 201058_s_at | -0.147    | 0.978 | 0.848    | 0.061 | 0.995     | 0.013 | 0.922           | 0.004 | YES         |
| 166 | 229510_at   | 0.125     | 0.978 | 0.659    | 0.080 | 0.784     | 0.019 | 0.721           | 0.007 | YES         |
| 167 | 202859_x_at | 0.330     | 0.958 | 1.127    | 0.046 | 0.796     | 0.150 | 0.961           | 0.015 | YES         |
| 168 | 206632_s_at | 0.189     | 0.986 | 0.305    | 0.761 | 0.494     | 0.628 | 0.400           | 0.552 | YES         |
| 169 | 232197_x_at | -0.068    | 0.989 | -0.837   | 0.021 | -0.769    | 0.016 | -0.803          | 0.002 | YES         |



| N°  | Probeset     | Mod - Mil |       | Sev -Mil |       | Sev - Mod |       | Sev-(Mil & Mod) |       | Pred. Sign. |
|-----|--------------|-----------|-------|----------|-------|-----------|-------|-----------------|-------|-------------|
|     |              | LFC       | Adj.P | LFC      | Adj.P | LFC       | Adj.P | LFC             | Adj.P |             |
| 170 | 210321_at    | -0.053    | 0.995 | -1.093   | 0.110 | -1.040    | 0.117 | -1.067          | 0.029 | YES         |
| 171 | 224225_s_at  | 0.216     | 0.982 | 0.517    | 0.552 | 0.301     | 0.784 | 0.409           | 0.518 | YES         |
| 172 | 244523_at    | 0.280     | 0.957 | 0.833    | 0.065 | 0.554     | 0.231 | 0.693           | 0.031 | YES         |
| 173 | 219519_s_at  | -0.538    | 0.960 | -1.011   | 0.335 | -0.473    | 0.728 | -0.742          | 0.340 | YES         |
| 174 | 217148_x_at  | -0.092    | 0.994 | -1.168   | 0.093 | -1.075    | 0.107 | -1.121          | 0.023 | YES         |
| 175 | 211748_x_at  | -0.321    | 0.952 | -0.885   | 0.021 | -0.564    | 0.125 | -0.724          | 0.007 | YES         |
| 176 | 213506_at    | 0.571     | 0.952 | 0.991    | 0.064 | 0.421     | 0.504 | 0.706           | 0.066 | YES         |
| 177 | 212592_at    | -0.016    | 0.998 | -0.889   | 0.088 | -0.872    | 0.076 | -0.880          | 0.018 | YES         |
| 178 | 234764_x_at  | -0.129    | 0.988 | -1.075   | 0.101 | -0.946    | 0.145 | -1.011          | 0.030 | YES         |
| 179 | 239196_at    | 0.673     | 0.952 | 1.350    | 0.037 | 0.677     | 0.326 | 1.014           | 0.026 | YES         |
| 180 | 219410_at    | -0.146    | 0.967 | -0.847   | 0.012 | -0.994    | 0.000 | -0.920          | 0.000 | YES         |
| 181 | 1569110_x_at | 0.040     | 0.996 | 0.286    | 0.718 | 0.246     | 0.793 | 0.266           | 0.637 | YES         |
| 182 | 208146_s_at  | 0.056     | 0.994 | -0.584   | 0.178 | -0.640    | 0.125 | -0.612          | 0.045 | YES         |
| 183 | 201242_s_at  | -0.343    | 0.952 | -0.406   | 0.120 | -0.749    | 0.001 | -0.577          | 0.002 | YES         |
| 184 | 221690_s_at  | -0.428    | 0.952 | -0.674   | 0.155 | -0.246    | 0.691 | -0.460          | 0.188 | YES         |
| 185 | 206343_s_at  | 0.199     | 0.981 | -0.211   | 0.803 | -0.409    | 0.619 | -0.310          | 0.574 | YES         |
| 186 | 205678_at    | 0.241     | 0.952 | 0.953    | 0.000 | 0.712     | 0.001 | 0.832           | 0.000 | YES         |
| 187 | 212187_x_at  | -0.279    | 0.952 | -0.820   | 0.015 | -0.541    | 0.080 | -0.680          | 0.004 | YES         |
| 188 | 221530_s_at  | 0.167     | 0.963 | -0.640   | 0.056 | -0.807    | 0.005 | -0.724          | 0.002 | YES         |
| 189 | 222196_at    | -0.147    | 0.977 | -0.412   | 0.369 | -0.265    | 0.627 | -0.338          | 0.311 | YES         |
| 190 | 206647_at    | 0.142     | 0.990 | 0.797    | 0.322 | 0.656     | 0.462 | 0.727           | 0.208 | YES         |
| 191 | 210262_at    | 0.116     | 0.982 | 0.817    | 0.063 | 0.701     | 0.093 | 0.759           | 0.015 | YES         |
| 192 | 213537_at    | -1.061    | 0.952 | -0.272   | 0.687 | -0.789    | 0.165 | -0.259          | 0.592 | YES         |
| 193 | 213566_at    | -0.005    | 0.999 | -0.594   | 0.027 | -0.589    | 0.013 | -0.591          | 0.002 | YES         |

| N°  | Probeset    | Mod - Mil |       | Sev -Mil |       | Sev - Mod |       | Sev-(Mil & Mod) |       | Pred. Sign. |
|-----|-------------|-----------|-------|----------|-------|-----------|-------|-----------------|-------|-------------|
|     |             | LFC       | Adj.P | LFC      | Adj.P | LFC       | Adj.P | LFC             | Adj.P |             |
| 194 | 209290_s_at | 0.067     | 0.988 | 0.947    | 0.007 | 0.881     | 0.002 | 0.914           | 0.000 | YES         |
| 195 | 238717_at   | -0.003    | 0.999 | -0.443   | 0.201 | -0.440    | 0.204 | -0.442          | 0.072 | YES         |

## References

- E1. Templeton KE, Scheltinga S a, Beersma MFC, Kroes ACM, Claas ECJ. Rapid and sensitive method using multiplex real-time PCR for diagnosis of infections by influenza A and influenza B viruses, respiratory syncytial virus, and parainfluenza viruses 1, 2, 3, and 4. *J Clin Microbiol* 2004;42:1564–9.
- E2. Ritchie ME, Phipson B, Wu D, Hu Y, Law CW, Shi W, Smyth GK. limma powers differential expression analyses for RNA-sequencing and microarray studies. 2015;1–13.doi:10.1093/nar/gkv007.
- E3. Pepe MS. Evaluating technologies for classification and prediction in medicine. *Stat Med* 2005;24:3687–3696.
- E4. Jong VL, Novianti PW, Roes KCB, Eijkemans MJC. Exploring homogeneity of correlation structures of gene expression datasets within and between etiological disease categories. *Stat Appl Genet Mol Biol* 2014;doi:10.1515/sagmb-2014-0003.
- E5. Kim KI, Simon R. Probabilistic classifiers with high-dimensional data. *Biostatistics* 2011;doi:10.1093/biostatistics/kxq069.
- E6. Bernhard Schölkopf and Alexander J. Smola. *Learning with Kernels*. MIT Press; 2001.
- E7. Tibshirani R, Hastie T, Narasimhan B, Chu G. Diagnosis of multiple cancer types by shrunken centroids of gene expression. *Proc Natl Acad Sci U S A* 2002;doi:10.1073/pnas.082099299.
- E8. Breiman L. Random forests. *Mach Learn* 2001;5–32.doi:10.1023/A:1010933404324.
- E9. Mejias A, Dimo B, Suarez NM, Garcia C, Suarez-Arrabal MC, Jartti T, Blankenship D, Jordan-Villegas A, Ardura MI, Xu Z, Banchereau J, Chaussabel D, Ramilo O. Whole Blood Gene Expression Profiles to Assess Pathogenesis and Disease Severity in Infants with Respiratory Syncytial Virus Infection. In: Smyth RL, editor. *PLoS Med* 2013;10:e1001549.
